# Supplementary material
Source: publisher figshare collection journal article supplement (https://acs.figshare.com/ndownloader/files/22768403)
Supplement: Supplementary file 1 [file 22768403]

## Supporting Information

### Sustainability analysis for the wastewater treatment technical route for coal-to-synthetic-natural-gas industry through zero liquid discharge vs. standard liquid discharge

Jingwei Yang,<sup>†</sup> Zhengkun Hou,<sup>†</sup> Fanqing Meng,<sup>†</sup> Jianguang Qi,<sup>†</sup> Zhaoyou Zhu,<sup>†</sup>

Yinglong Wang,<sup>†</sup> Jun Gao,<sup>‡</sup> and Peizhe Cui<sup>\*,†</sup>

<sup>†</sup> *College of Chemical Engineering, Qingdao University of Science and Technology, 53 Zhengzhou Road, Qingdao 266042, P. R. China*

<sup>‡</sup> *College of Chemical and Environmental Engineering, Shandong University of Science and Technology, 579 Qianwangang Road, Qingdao 266590, P. R. China*

\*Corresponding author

Email: [cpzmagic@qust.edu.cn](mailto:cpzmagic@qust.edu.cn)

Number of pages: 8

Number of tables: 9

Number of figures: 0

This supporting information file contains 9 Tables and the details are shown as follow:

- Table S1. Water quality of fix-bed coal gasification wastewater
- Table S2. Mass balance of wastewater treatment process
- Table S3. Reuse water quality indexes
- Table S4. Summary of detailed inventory for SLD and ZLD
- Table S5. Estimation coefficients of the total production cost
- Table S6. Percentage of investment component
- Table S7. Unit external cost of pollutant emissions
- Table S8. Equivalent factor of GHG emissions (100 years)
- Table S9. Weighting factor by environment and human health impact categories

Table S1. Water quality of fix-bed coal gasification wastewater

| Type                   | Pollutants         | Concentration (mg/L) |
|------------------------|--------------------|----------------------|
| Insoluble oils         | Middle oils        | 12000                |
|                        | Tar                | 15000                |
| Sour gases             | CO <sub>2</sub>    | 4500                 |
|                        | H <sub>2</sub> S   | 300                  |
| Ammonia nitrogen       | Ammonia            | 8000                 |
| Phenols                | Phenol             | 2000                 |
|                        | Methylphenol       | 1000                 |
|                        | Dimethylphenol     | 200                  |
|                        | Trimethylphenol    | 150                  |
|                        | Ethylphenol        | 150                  |
|                        | O-dihydroxybenzene | 600                  |
|                        | Resorcin           | 500                  |
|                        | Hydroquinone       | 1500                 |
|                        | Methyl diphenol    | 150                  |
|                        | Polyphenols        | 300                  |
| Heterocyclic compounds | Indoline           | 150                  |
|                        | Pyridine           | 100                  |
|                        | Quinoline          | 1100                 |
|                        | Imidazole          | 100                  |
| MAHs and PAHs          | Benzene            | 300                  |
|                        | Methylbenzene      | 200                  |
|                        | Ethylbenzene       | 250                  |
|                        | Biphenyl           | 50                   |
|                        | Naphthalene        | 20                   |
| Long-chain alkanes     |                    | 450                  |
| Fatty acids            | Acetic acid        | 600                  |
|                        | Propionic acid     | 200                  |
|                        | Butyric acid       | 200                  |
|                        | Valeric acid       | 200                  |
|                        | Hexanoic acid      | 200                  |

Table S2. Mass balance of wastewater treatment process

| Number | Flow<br>( t/h ) | Insoluble<br>oils(mg/L) | Acid<br>gas(mg/L) | Ammonia<br>Nitrogen(mg/L<br>) | Total<br>phenols(mg/L) | Heterocyclic<br>compounds(mg/L) | Maps &<br>Haps(mg/L) | Long chain<br>alkanes(mg/L) | Fatty<br>acids(mg/L) |
|--------|-----------------|-------------------------|-------------------|-------------------------------|------------------------|---------------------------------|----------------------|-----------------------------|----------------------|
| 1      | 1800            | 27000                   | 4800              | 8000                          | 6500                   | 1450                            | 820                  | 450                         | 1400                 |
| 2      | 700             | 300                     | 4800              | 8000                          | 6500                   | 1450                            | 820                  | 450                         | 1400                 |
| 3      | 1100            | 300                     | 50                | 8000                          | 450                    | 1450                            | 820                  | 450                         | 1400                 |
| 4      | 1100            | 50                      | -                 | 200                           | 5                      | 650                             | 120                  | 230                         | 860                  |
| 5      | 1100            | -                       | -                 | 50                            | 1                      | 80                              | 10                   | 40                          | -                    |
| 6      | 1100            | -                       | -                 | 20                            | -                      | 15                              | 2                    | 10                          | -                    |
| 7      | 140             | -                       | -                 | 25                            | 0.2                    | 20                              | 1.7                  | 8.6                         | 51                   |
| 8      | 960             | -                       | -                 | 12                            | 0.1                    | 7                               | 1                    | 5                           | 5                    |
| 9      | 112             | -                       | -                 | 15                            | 0.2                    | -                               | -                    | -                           | 24                   |
| 10     | 1072            | -                       | -                 | 12                            | -                      | 7                               | 1                    | 5                           | 6                    |
| 11     | 28              | -                       | -                 | -                             | -                      | -                               | -                    | -                           | -                    |

Table S3. Reuse water quality indexes

| Items              | Control indexes | units |
|--------------------|-----------------|-------|
| pH                 | 6.5-8.5         | -     |
| COD                | 40              | mg/L  |
| Ammonia nitrogen   | 5               | mg/L  |
| Total phenols      | 0.2             | mg/L  |
| Heterocyclic       | 5               | mg/L  |
| Long-chain alkanes | 5               | mg/L  |
| Fatty acids        | 5               | mg/L  |
| TDS                | 400             | mg/L  |
| Turbidity          | 3               | NTU   |
| Suspended solids   | 10              | mg/L  |
| Total hardness     | 300             | mg/L  |
| Total alkalinity   | 250             | mg/L  |
| Chloridion         | 100             | mg/L  |
| Total phosphorus   | 1               | mg/L  |

Table S4. Summary of detailed inventory for SLD and ZLD

|                        | Unit | T1      | T2                       | T3     | T4      | T5    | T6      |
|------------------------|------|---------|--------------------------|--------|---------|-------|---------|
| Inputs                 |      |         |                          |        |         |       |         |
| Wastewater 1           | t    | 1800    | 1052                     | 1030   | 1026.5  | 1026  | 136     |
| Electricity            | kWh  | 3626    | 1650                     | 5689   | 550     | 270   | 3000    |
| MIBK                   | kg   | -       | 300                      | -      | -       | -     | -       |
| PAM                    | kg   | -       | -                        | 10.894 | 4.921   | -     | -       |
| Defoaming agent        | kg   | -       | -                        | 25.419 | -       | -     | -       |
| NaClO                  | kg   | -       | -                        | -      | 31.845  | -     | 8.75    |
| PAC                    | kg   | -       | -                        | 6.875  | 330.507 | 8.25  | -       |
| Activated coke         | kg   | -       | -                        | -      | 1.747   | -     | -       |
| Scale inhibitors       | kg   | -       | -                        | -      | -       | 9.375 | 9.375   |
| Reducing agent         | kg   | -       | -                        | -      | -       | 17.5  | 2.5     |
| Fungicide              | kg   | -       | -                        | -      | -       | 4.375 | -       |
| HCl                    | kg   | -       | -                        | -      | -       | -     | 8.75    |
| NaOH                   | kg   | -       | 1800                     | -      | -       | -     | 62.5    |
| Steam                  | t    | 42(0.5) | 46(0.5),136(1.5),20(4.7) |        | -       | -     | 40(0.5) |
| CaSO <sub>4</sub>      | kg   | -       | -                        | -      | -       | -     | 375     |
| Outputs                |      |         |                          |        |         |       |         |
| Wastewater 2           | t    | 700     | -                        | -      | -       | -     | -       |
| Treated wastewater     | t    | 1052    | 1030                     | 1026.5 | 1026    | 136   | -       |
| Insoluble oils         | t    | 48      | -                        | 0.515  | -       | -     | -       |
| Acid gas               | t    | -       | 5                        | 0.515  | -       | -     | -       |
| Ammonia nitrogen       | kg   | -       | 8210                     | 154.5  | 30.8    | -     | -       |
| Total phenols          | kg   | -       | 6410                     | 458.35 | 4.11    | -     | -       |
| Heterocyclic compounds | kg   | -       | 840                      | 1617.1 | 66.7    | -     | -       |

|                    |                |   |     |       |      |     |       |
|--------------------|----------------|---|-----|-------|------|-----|-------|
| MAPs and HAPs      | kg             | - | 740 | 113.3 | 8.21 | -   | -     |
| Long chain alkanes | kg             | - | 230 | 195.7 | 30.8 | -   | -     |
| Fatty acids        | kg             | - | 570 | 885.8 | -    | -   | -     |
| Wet coke           | t              | - | -   | -     | 4.24 | -   | -     |
| Sludge             | m <sup>3</sup> | - | -   | 5.54  | -    | -   | -     |
| Salts              | t              | - | -   | -     | -    | -   | 27.2  |
| Reused water       | t              | - | -   | -     | -    | 890 | 108.8 |

Table S5. Estimation coefficients of the total production cost

| Component                            | Reference value                   | Design value                           |
|--------------------------------------|-----------------------------------|----------------------------------------|
| (1) Operating costs                  |                                   |                                        |
| (1.1) Direct costs                   |                                   |                                        |
| (1.1.1) Raw material                 | 10~50% of production cost         | Calculated value                       |
| (1.1.2) Operating labor              | 10~20% of production cost         | 300 labors 30000CNY/labor/year         |
| (1.1.3) Regulatory costs             | 10~20% of operating labor         | 15% of operating labor                 |
| (1.1.4) Utilities                    | 10~20% of production cost         | Calculated value                       |
| (1.1.5) Maintenance and repairs      | 2~10% of capital investment       | 10% of capital investment              |
| (1.1.6) Operating supplies           | 0.5~1% of capital investment      | 0.75% of capital investment            |
| (1.1.7) Laboratory charge            | 10~15% of operating labor         | 10% of operating labor                 |
| (1.2) Fixed expenses                 |                                   |                                        |
| (1.2.1) Depreciation                 | As appropriate                    | Life period 20 years, salvage value 4% |
| (1.2.2) Tax                          | 1~4% of capital investment        | 4% of capital investment               |
| (1.2.3) Insurance                    | 0.4~1% of capital investment      | 0.7% of capital investment             |
| (1.2.4) Rent                         | 8~12% of buildings and land       | 10% of buildings and land              |
| (1.3) Plant overhead costs           | 5~15% of direct costs             | 10% of direct costs                    |
| (2) Daily costs                      |                                   |                                        |
| (2.1) Administrative costs           | 2~6% of production cost           | 4% of production cost                  |
| (2.2) Distribution and selling costs | 2~20% of production cost          | 4% of production cost                  |
| (2.3) Research cost                  | 2~5% of production cost           | 2% of production cost                  |
| (2.4) Financial cost                 | 0~10% of total capital investment | 2% of total capital investment         |
| (3) Production cost                  | (1)+(2)                           | (1)+(2)                                |

Table S6. Percentage of investment components

| Component                            | Value range (%) | Calculated value (%) |
|--------------------------------------|-----------------|----------------------|
| (1) Direct investment                |                 |                      |
| (1.1) Equipment                      | 15~40           | 21                   |
| (1.2) Installation                   | 6~14            | 10                   |
| (1.3) Instruments and controls       | 2~8             | 5                    |
| (1.4) Piping                         | 2~20            | 12                   |
| (1.5) Electrical                     | 2~10            | 6                    |
| (1.6) Buildings (including services) | 3~18            | 15                   |
| (1.7) Land                           | 1~2             | 1                    |
| (2) Indirect investment              |                 |                      |
| (2.1) Engineering and supervision    | 4~21            | 10                   |
| (2.2) Construction expenses          | 3~16            | 9                    |
| (2.3) Contractor's fee               | 2~6             | 4                    |
| (2.4) Contingency                    | 5~15            | 7                    |
| (3) Fixed capital investment         | (1)+(2)         | 100                  |
| (4) Working capital                  | 10~20           | 17                   |
| (5) Total capital investment         | (3)+(4)         | 117                  |

Table S7. Unit external cost of pollutant emissions

| Pollutants        | Unit external cost (CNY/kg) |
|-------------------|-----------------------------|
| CO <sub>2</sub>   | 0.195                       |
| CH <sub>4</sub>   | 1.46                        |
| PM <sub>2.5</sub> | 156                         |
| NO <sub>x</sub>   | 31.9                        |
| SO <sub>2</sub>   | 24.5                        |
| CO                | 4.15                        |

Table S8. Equivalent factor of GHG emissions (100 years)

| GHG              | CF (kg CO <sub>2</sub> -eq/kg) |
|------------------|--------------------------------|
| CO <sub>2</sub>  | 1                              |
| N <sub>2</sub> O | 298                            |
| CH <sub>4</sub>  | 25                             |

Table S9. Weighting factor by environment and human health impact categories

| Categories       | Environment impact |       |       |       |       | Human health impact |       |
|------------------|--------------------|-------|-------|-------|-------|---------------------|-------|
|                  | GWP                | AP    | EP    | ADP   | POCP  | HCP                 | HNCP  |
| Weighting factor | 0.644              | 0.124 | 0.149 | 0.044 | 0.039 | 0.750               | 0.250 |
